# Supplementary material for: The synthesis of a di-N-heterocyclic carbene-amido complex of palladium(ii)
Source: Royal Society of Chemistry journal article supplement (doi:10.1039/b314814a), 2004-01-01
Supplement: b314814a.doc [file b314814a.doc]

Supplementary Information

The Synthesis of a Di-N-Heterocyclic Carbene Amido Complex of Palladium(II)

Richard E. Douthwaite**a*, Jennifer Houghton*a* and Benson M. Kariuki*b*

a Department of Chemistry, University of York,Heslington, York YO10 5DD, UK. Fax: +44 (0)1904 432516; Tel: +44 (0)1904 434183; E-mail: red4@york.ac.uk

b Department of Chemistry, University of Birmingham, Edgbaston, Birmingham B15 2TT, UK.

**General Procedures**.Dioxygen and water sensitive reactions and manipulations were performed using Schlenk techniques under an argon atmosphere. All solvents were distilled under dinitrogen from a drying agent prior to use: calcium hydride(dichloromethane and acetonitrile) or sodium benzophenone ketyl (diethyl ether, petroleum ether (40-60 ºC) and tetrahydrofuran). All reagents were used as supplied (Aldrich). [PdCl2(MeCN)2] was prepared1 using literature procedures. 1Hand 13C NMR spectra were recorded at probe temperature on Joel JNM-EX270 or Bruker AMX 500 spectrometers. Chemical shifts are described in parts per million downfield shift from SiMe4 and are reported consecutively as position (H or C), relative integral, multiplicity (s = singlet, d = doublet, t = triplet, q = quartet, m = multiplet, dd = doublet of doublet, br = broad, v = virtual), coupling constant (*J*/Hz) and assignment. 1H NMR spectra were referenced internally to the residual protio solvent resonance of CHCl3 ( 7.26). 13C{1H} NMR PENDANT spectra were referenced to CDCl3 ( 77.0). 1H COSY, 13C HSQC, PENDANT and Gradient HMBC experiments were performed using standard Brüker pulse sequences. Chemical ionisation, (CI+), and Fast Atom Bombardment (FAB+) mass spectra were recorded on a Micromass Autospec, using 3-nitrobenzyl alcohol as the matrix. Electrospray (ES) mass spectra were recorded on a Micromass LCT. Masses were analysed by Time Of Flight, (TOF), using methanol as the mobile phase. Elemental analyses were performed at the University of North London. Line shape analysis was performed using g-NMR.

**Benzyl-bis-(2-chloro-ethyl)-amine (1)**:An aqueous solution (50 mL) of bis(2-dichloroethyl)amine hydrochloride (20.0 g, 0.112 mol) was poured into a aqueous sodium hydroxide solution (50 mL, 0.125 mol). The resulting mixture was stirred for 5 min, the two layers separated, and the organic phase dissolved in acetonitrile (50 mL) and dried over magnesium sulphate for 1 hr. The resulting solution was poured into a mixture of sodium carbonate (40 g, 0.377 mol) in acetonitrile (50 mL) and then an acetonitrile solution (30 mL) of benzyl bromide (14.63 mL, 0.123 mol) was added. The mixture was stirred for 4 hr at 25 oC, filtered, and the volatiles removed from the filtrate under reduced pressure to give a creamy crystalline solid. The solid was stirred with a solution of triethylamine (6 mL) in 40-60 petroleum ether (50 mL) giving a precipitate of (*N*, *N*, *N*-triethylbenzyl)ammonium bromide that was removed by filtration and the filtrate was concentrated under reduced pressure to give a yellow liquid. Distillation of the liquid at 1 mmHg gave **1** as a colourless oil. Yield = 9.8 g, 48 %. b.p. = 99-100°C (1 mmHg); 1H NMR (300 MHz, CDCl3) 2.93 (4 H, t, 3*J*H-H = 6.9, C*H2*Cl), 3.50 (4 H, t, 3*J*H-H = 6.9, C*H2*N), 3.74 (2 H, s, NC*H2*Ph), 7.23-7.41 (5 H, m, C6*H*5); 13C{1H} NMR(75 MHz, CDCl3) 42.0 (*C*H2Cl), 56.3 (*C*H2N), 59.1 (N*C*H2Ph), 127.3 (*C*6H5), 128.4 (*C*6H5), 128.5 (*C*6H5), 137.6 (*ipso*-*C*6H5); MS(TOF ES+) *m/z* 234.0 ([M + 2H]+, 61 %), 232.0 (100, [M]+); HRMS Calc. for C11H16Cl2N: 232.0660, Found: 232.0657

**(tBuC(H)N(Bn)C(H)tBu)2Cl-** (**2**):1-*tert*-butylimidazole (16.65 g, 0.134 mol) was added to a 1,4-dioxane solution (140 mL) of **1** (13.47 g, 0.058 mol) and the mixture was stirred under reflux for 18 hr. The mixture was concentrated under reduced pressure, extracted with water (2 x 50 mL) and the aqueous layer washed with 40-60 petroleum ether (2 x 50 mL), and dichloromethane (2 x 50 mL). The volatiles were then removed under reduced pressure to give **2** as a white solid. Yield = 10.65 g, 39%. 1H NMR (300 MHz, D2O) 1.54 (18H, s, C*H*3), 3.00 (4H, t, 3*J*H-H = 5.7, CH2C*H2*), 3.60 (2H, s, PhC*H2*), 4.22 (4H, t, 3*J*H-H= 5.7, C*H*2CH*2*), 6.97 (2H, m, C6*H*5), 7.26 (5H, m, C6*H*5 + 2 x CH=C*H*), 7.61 (2H, m, C*H*=CH), 8.67 (2H, br s, NC*H*N); 13C{1H} NMR (75 MHz, D2O) 31.4 (*C*H3), 49.8 (CH2*C*H2), 55.6 (*C*H2CH2), 59.8 (Ph*C*H2), 62.5 (*C*(CH3)3), 122.6 (CH=*C*H), 125.1 (*C*H=CH), 130.3 (*C*6H5), 131.3 (*C*6H5), 131.3 (*C*6H5), 136.2 (N*C*HN), 140.5 (*ipso*-*C*6H5); MS (TOF ES+) *m/z* 480.5 ([M]+, 11 %), 408.7 ([M – 2Cl]+, 95 %), 444.6 (100, [M - Cl]+); HRMS calc. for C25H39ClN5; 444.2894, found444.2895.

**(tBuC(H)N(H)C(H)tBu)2Cl-** (**3**):To an ethanol solution (130 mL) of **2** (4.61 g, 9.6 mmol) was added Pd/C 10 % (1.5 g) and the mixture stirred at 65 °C under one atmosphere of hydrogen for 18 hr. The mixture was then filtered and the volatiles removed from the filtrate under reduced pressure to give **3** as an off white foam. Yield = 3.50 g, 93 %. 1H NMR (300 MHz, D2O) 1.59 (18 H, s, C*H*3), 3.06 (4 H, t, 3*J*H-H = 6.1, CH2C*H*2), 4.25 (4 H, t, 3*J*H-H = 6.1, C*H*2CH2), 7.47 (2 H, s, CH*=*C*H*), 7.64 (2 H, s, C*H*=CH), 8.85 (2 H, s, NC*H*N); 13C{1H} NMR (75MHz, D2O) 31.4 (*C*H3), 50.2 (CH2*C*H2), 51.3 (*C*H2CH2), 62.5 (*C*(CH3)3), 122.8 (CH=*C*H), 125.1 (*C*H=CH), 136.5 (N*C*HN); MS(TOF ES+) *m/z* 354.3 ([M-Cl]+, 8 %), 318.3 (100, [M – 2Cl – H]+). HRMS calc. for C18H33N5Cl;354.2424, found 354.2425.

**(tBuC(AgCl)N(H)C(AgCl)tBu)** (**4**)To a dichloromethane solution (60 mL) of **3** (2.15 g, 5.5 mmol) was added Ag2O (1.53 g, 6.6 mmol) and the mixture stirred in the dark for 18 hr. The mixture was then filtered and volatiles removed from the filtrate under reduced pressure to afford compound **4** as a pink foam. Yield = 2.57 g, 64%. 1H NMR (300 MHz, CDCl3) 1.71 (18 H, s, C*H*3), 3.02 (4 H, t, 3*J*H-H = 5.9, CH2C*H*2), 4.23 (4 H, t, 3*J*H-H = 5.9, C*H*2CH2), 7.18 (2 H, d, 3*J*H-H = 6.0, CH=C*H*), 7.19 (2 H, d, 3*J*H-H = 6.0, C*H*=CH); 13C{1H} NMR (75 MHz, CDCl3), 32.2 (*C*H3), 50.6 (CH2*C*H2), 53.5 (*C*H2CH2), 58.1 (*C*(CH3)3), 119.3 (CH=*C*H), 120.8 (*C*H=CH), 178.0 (*C*Ag); MS (TOF ES+) *m/z* 644.5 ([M+K]+, 7 %), 318.2 (M-2Cl-2Ag-H]+, 76 %), 354.2 (100, [M-Cl-2Ag-H]+). Anal. [found (Calc.)] for C18H33Ag2Cl2N5: C 35.76 (35.79), H 5.32 (5.17), N 11.42 (11.59).

**[(tBuCN(H)CtBu)PdCl]** **Cl-** **(5)**: Dichloromethane solutions of [PdCl2(CH3CN)2] (10 mL, 100 mg, 0.39 mmol) and **4** (10 mL, 240 mg, 0.39 mmol) were added simultaneously to dichloromethane (20 mL) and stirred at 25 oC for 1 hr. A precipitate formed immediately. The mixture was filtered and the volatiles removed from the filtrate under reduced pressure to give a yellow solid. The solid was washed with acetonitrile (4  10 mL) to give **5** as a white solid. Yield = 73 mg, 38 %. 1H NMR (300 MHz, CDCl3, -40 oC) 1.87 (1H, m, (NH)C*H*2CHaHb), 1.93 (9H, s, C*H*3), 1.96 (9H, s, C*H*3), 2.43 (1H, m, (NH)C*H*2CHcHd), 3.33 (1H, m, (NH)C*H*2CHcHd), 3.54 (1H, m, (NH)C*H*2CHcHd), 4.04 (1H, d, 2*J*H-H = 13.5, (NH)CH2C*H*aHb), 4.15 (1H, dd, 2*J*H-H = 14.1, 3*J*H-H = 4.7, (NH)CH2C*H*cHd) 4.46 (1H, dd, 2*J*H-H = 13.5, 3*J*H-H = 11.0, (NH)CH2CHa*H*b) 5.16 (1H, ddd, 2*J*H-H = 14.1, 3*J*H-H = 12.9, 3*J*H-H = 4.7, (NH)CH2CHc*H*d) 7.00 (1H, d, 3*J*H-H = 1.7, CH=C*H*), 7.04 (1H, d, 3*J*H-H = 1.7, C*H*=CH) 7.11 (2H, d, 3*J*H-H = 1.7, C*H*=CH), 8.33 (1H, m, N*H*); Insolubility prevented the acquisition of 13C NMR data.MS (TOF ES+) *m/z* 458.3 ([M-Cl+] 3 %) 422.3 (100, [M-2Cl]+. HRMS calc. for C18H30N5Pd: 422.1531, found 422.1536. Anal. [found (calc.)] for C18H31N5PdCl2: C 43.28 (43.70), H 6.20 (6.27), N 13.95 (14.16).

**[tBuCNCtBuPdCl]** (**6**): To a dichloromethane solution (10 ml) of **5** (62 mg, 0.125 mmol) was added a THF solution (5 mL) of sodium hydride (30 mg, 1.25 mmol) and the mixture stirred for 24 hr at 25 oC. The volatiles were removed under reduced pressure and the resulting yellow solid extracted with toluene (2 x 20 ml). The volatiles were removed to give **6** as a pale yellow solid (Yield = 35 mg, 61 %). 1H NMR (300 MHz, CD2Cl2, -40 oC) 1.98 (18H, s, C*H*3), 3.54 (2H, m, CH2C*H*2), 3.90 (2H, m, CH2C*H*2), 4.63 (2H, m, C*H*2CH2), 5.32 (2H, m, C*H*2CH2), 6.88 (2H, d, 3*J*H-H = 2.59, C*H*=CH), 6.95 (2H, d, 3*J*H-H = 2.59, CH=C*H*); 13C{1H} NMR (75 MHz, CD2Cl2, 25 oC) 32.0 (*C*H3), 58.4 (*C*(CH3)3), 58.5 (CH2*C*H2), 59.9 (*C*H2CH2), 118.1 (CH=*C*H), 119.8 (CH=*C*H), 120.8 (*C*H=CH), 122.5 (*C*H=CH), 165.7 (*C*Pd); MS (TOF ES+) *m/z* 422 (100, [M-Cl]+) ; Anal. [found (calc.)] for C18H30N5PdCl: C 46.97 (47.17), H 6.60 (6.40), N 15.00 (15.28).

# References

(1) G. K. Anderson, M. Lin*, Inorg. Synt*h. 1990**,** 28, 60.

Table 1. Crystal data and structure refinement for compound **5**.

Empirical formula C18 H31 Cl2 N5 Pd

Formula weight 494.78

Temperature 273(2) K

Wavelength 1.54178 A

Crystal system, space group Monoclinic, P21/c

Unit cell dimensions a = 12.5628(15) A alpha = 90 deg.

b = 10.3135(15) A beta = 92.159(7) deg.

c = 17.2307(18) A gamma = 90 deg.

Volume 2230.9(5) A^3

Z, Calculated density 4, 1.473 Mg/m^3

Absorption coefficient 8.998 mm^-1

F(000) 1016

Crystal size 0.40 x 0.20 x 0.04 mm

Theta range for data collection 3.52 to 40.87 deg.

Limiting indices -10<=h<=10, -8<=k<=8, -14<=l<=13

Reflections collected / unique 4802 / 1407 [R(int) = 0.1069]

Completeness to theta = 40.87 98.3 %

Max. and min. transmission 0.7148 and 0.1234

Refinement method Full-matrix least-squares on F^2

Data / restraints / parameters 1407 / 177 / 241

Goodness-of-fit on F^2 1.084

Final R indices [I>2sigma(I)] R1 = 0.0636, wR2 = 0.1623

R indices (all data) R1 = 0.0905, wR2 = 0.1820

Largest diff. peak and hole 1.111 and -0.863 e.A^-3

Table 2. Atomic coordinates ( x 10^4) and equivalent isotropic

displacement parameters (A^2 x 10^3) for compound **5**.

U(eq) is defined as one third of the trace of the orthogonalized

Uij tensor.

________________________________________________________________

x y z U(eq)

________________________________________________________________

Cl(1) 7479(3) 7656(4) 2173(2) 46(2)

Cl(2) 7584(3) 3744(4) 4728(2) 51(2)

Pd(1) 7617(1) 7299(1) 3515(1) 37(1)

N(3) 7669(9) 6774(13) 4668(7) 44(4)

C(1) 6197(11) 6308(15) 3520(9) 39(4)

N(1) 5680(9) 5306(11) 3176(7) 34(3)

C(2) 4673(11) 5130(15) 3507(9) 42(4)

C(3) 4607(12) 6020(15) 4068(9) 46(4)

N(2) 5535(9) 6728(12) 4087(7) 38(3)

C(4) 5850(12) 7710(14) 4636(9) 45(4)

C(5) 6783(12) 7304(15) 5153(9) 45(4)

C(6) 6072(11) 4413(15) 2535(9) 40(4)

C(7) 5600(12) 3078(15) 2675(9) 57(5)

C(8) 5649(11) 4959(14) 1774(8) 49(5)

C(9) 7266(10) 4357(15) 2575(9) 46(5)

C(10) 9043(12) 8314(16) 3692(10) 50(4)

N(4) 9470(9) 9454(12) 3476(7) 43(3)

C(11) 10546(11) 9518(16) 3773(9) 49(4)

C(12) 10726(12) 8424(16) 4173(9) 49(4)

N(5) 9824(10) 7676(12) 4122(7) 45(3)

C(13) 9604(11) 6548(14) 4585(8) 40(4)

C(14) 8703(11) 6819(15) 5108(8) 42(4)

C(15) 8987(11) 10568(15) 2994(9) 46(4)

C(16) 7801(10) 10596(17) 3147(10) 68(6)

C(17) 9218(12) 10289(14) 2158(9) 59(5)

C(18) 9506(12) 11829(14) 3257(10) 57(5)

________________________________________________________________

Table 3. Bond lengths [A] and angles [deg] for compound **5**.

_____________________________________________________________

Cl(1)-Pd(1) 2.341(4)

Pd(1)-C(1) 2.057(15)

Pd(1)-N(3) 2.058(12)

Pd(1)-C(10) 2.087(15)

N(3)-C(14) 1.479(16)

N(3)-C(5) 1.518(19)

C(1)-N(1) 1.346(15)

C(1)-N(2) 1.377(15)

N(1)-C(2) 1.419(15)

N(1)-C(6) 1.533(16)

C(2)-C(3) 1.338(16)

C(3)-N(2) 1.375(15)

N(2)-C(4) 1.432(14)

C(4)-C(5) 1.504(16)

C(6)-C(9) 1.501(15)

C(6)-C(8) 1.505(15)

C(6)-C(7) 1.521(16)

C(10)-N(4) 1.351(15)

C(10)-N(5) 1.375(15)

N(4)-C(11) 1.429(15)

N(4)-C(15) 1.530(16)

C(11)-C(12) 1.337(16)

C(12)-N(5) 1.371(15)

N(5)-C(13) 1.443(15)

C(13)-C(14) 1.499(16)

C(15)-C(17) 1.508(16)

C(15)-C(18) 1.516(15)

C(15)-C(16) 1.522(16)

C(1)-Pd(1)-N(3) 82.1(5)

C(1)-Pd(1)-C(10) 171.4(7)

N(3)-Pd(1)-C(10) 89.7(6)

C(1)-Pd(1)-Cl(1) 92.8(4)

N(3)-Pd(1)-Cl(1) 173.4(4)

C(10)-Pd(1)-Cl(1) 95.6(5)

C(14)-N(3)-C(5) 110.8(11)

C(14)-N(3)-Pd(1) 118.7(9)

C(5)-N(3)-Pd(1) 116.0(9)

N(1)-C(1)-N(2) 105.1(12)

N(1)-C(1)-Pd(1) 141.7(11)

N(2)-C(1)-Pd(1) 113.1(10)

C(1)-N(1)-C(2) 110.2(12)

C(1)-N(1)-C(6) 127.9(12)

C(2)-N(1)-C(6) 121.9(11)

C(3)-C(2)-N(1) 106.4(13)

C(2)-C(3)-N(2) 107.9(14)

C(3)-N(2)-C(1) 110.5(12)

C(3)-N(2)-C(4) 127.2(13)

C(1)-N(2)-C(4) 122.2(12)

N(2)-C(4)-C(5) 112.6(12)

C(4)-C(5)-N(3) 110.3(13)

C(9)-C(6)-C(8) 111.9(12)

C(9)-C(6)-C(7) 110.6(13)

C(8)-C(6)-C(7) 110.5(12)

C(9)-C(6)-N(1) 109.7(11)

C(8)-C(6)-N(1) 106.9(12)

C(7)-C(6)-N(1) 107.0(12)

N(4)-C(10)-N(5) 106.4(13)

N(4)-C(10)-Pd(1) 138.1(12)

N(5)-C(10)-Pd(1) 115.5(11)

C(10)-N(4)-C(11) 108.8(12)

C(10)-N(4)-C(15) 130.5(12)

C(11)-N(4)-C(15) 120.7(11)

C(12)-C(11)-N(4) 106.6(13)

C(11)-C(12)-N(5) 108.6(14)

C(12)-N(5)-C(10) 109.7(13)

C(12)-N(5)-C(13) 126.4(13)

C(10)-N(5)-C(13) 122.4(13)

N(5)-C(13)-C(14) 110.3(12)

N(3)-C(14)-C(13) 110.8(12)

C(17)-C(15)-C(18) 110.6(12)

C(17)-C(15)-C(16) 113.2(13)

C(18)-C(15)-C(16) 110.2(13)

C(17)-C(15)-N(4) 106.7(12)

C(18)-C(15)-N(4) 109.0(12)

C(16)-C(15)-N(4) 106.9(11)

_____________________________________________________________

Symmetry transformations used to generate equivalent atoms:

Table 4. Anisotropic displacement parameters (A^2 x 10^3) for compound **5**.

The anisotropic displacement factor exponent takes the form:

-2 pi^2 [ h^2 a*^2 U11 + ... + 2 h k a* b* U12 ]

_______________________________________________________________________

U11 U22 U33 U23 U13 U12

_______________________________________________________________________

Cl(1) 35(3) 65(4) 36(4) 6(2) -1(2) -3(2)

Cl(2) 28(3) 70(4) 55(3) 12(3) 7(2) 6(2)

Pd(1) 25(1) 55(1) 33(1) 1(1) 0(1) -2(1)

N(3) 26(7) 52(8) 52(9) 0(7) -13(7) 2(7)

C(1) 30(5) 44(6) 41(6) -2(4) -1(4) -3(4)

N(1) 23(6) 41(7) 40(8) 5(6) 1(6) -5(6)

C(2) 25(8) 48(10) 52(10) 5(8) -6(8) -15(8)

C(3) 28(8) 54(10) 55(10) 3(8) -3(9) -9(8)

N(2) 27(7) 47(8) 40(7) -6(6) 3(6) -6(6)

C(4) 38(9) 52(10) 44(10) -10(8) 2(8) -1(8)

C(5) 33(9) 55(9) 46(10) -3(8) -9(8) -2(8)

C(6) 32(9) 47(10) 40(10) 5(8) -4(8) -11(8)

C(7) 38(11) 75(14) 58(13) 1(11) -17(10) 8(10)

C(8) 44(11) 53(12) 49(13) -9(10) -9(9) -4(9)

C(9) 35(11) 60(12) 42(11) -2(10) 6(9) 25(10)

C(10) 34(9) 62(10) 53(10) -2(9) -1(8) -12(8)

N(4) 26(7) 57(9) 47(8) 2(7) 2(6) -5(7)

C(11) 26(8) 65(10) 56(10) 3(8) 4(8) -4(9)

C(12) 37(9) 61(11) 50(9) 9(8) 4(8) -13(9)

N(5) 42(8) 54(9) 39(8) 11(7) -3(7) -3(7)

C(13) 37(8) 49(10) 33(9) 9(8) -6(7) 4(8)

C(14) 39(9) 52(9) 34(9) 0(8) -8(8) -8(8)

C(15) 27(9) 59(10) 52(10) 9(9) 11(8) -7(8)

C(16) 41(12) 77(14) 87(14) 4(12) 7(11) 6(10)

C(17) 56(12) 52(12) 69(14) 23(11) 12(11) 1(10)

C(18) 34(11) 42(12) 95(15) 8(11) -8(10) -12(9)

_______________________________________________________________________
